# Supplementary material for: Bromoditerpenes from the Red Seaweed Sphaerococcus coronopifolius as Potential Cytotoxic Agents and Proteasome Inhibitors and Related Mechanisms of Action
Source: MDPI journal article supplement (doi:10.3390/md20100652), 2022-10-20
Supplement: s1 [file s1]

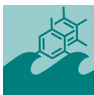

## Supplementary Materials

Bromoditerpenes from the red seaweed *Sphaerococcus coronopifolius* as potential cytotoxic agents and proteasome inhibitors and related mechanisms of action

## • NMR Data

Table S1. <sup>1</sup>H (400 MHz) and <sup>13</sup>C (125 MHz) NMR data (CDCl<sub>3</sub>) of bromosphaerol.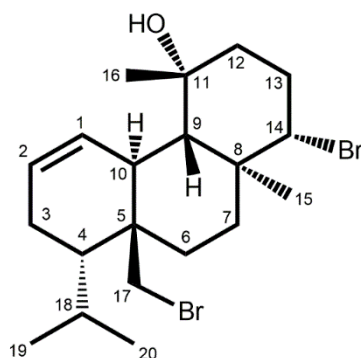

| Atom n° | Tested compound                |                       | Literature Data <sup>1</sup>      |                       | Group           |
|---------|--------------------------------|-----------------------|-----------------------------------|-----------------------|-----------------|
|         | $\delta^1\text{H}$ , m, J (Hz) | $\delta^{13}\text{C}$ | $\delta^1\text{H}$ , m, J (Hz)    | $\delta^{13}\text{C}$ |                 |
| 1       | 6.01 <i>br d</i> (10.6)        | 128.59                | 6.01 <i>br d</i> (10.5)           | 128.65                | CH              |
| 2       | 5.69 <i>m</i> (10.6)           | 126.96                | 5.69 <i>dm</i> (10.5)             | 126.88                | CH              |
| 3       | 2.14 <i>m</i>                  | 21.88                 | 2.13 <i>m</i>                     | 21.91                 | CH <sub>2</sub> |
|         | 1.93 <i>m</i>                  |                       | 1.92 – 2.00 <i>m</i>              |                       |                 |
| 4       | 1.76 <i>m</i>                  | 42.56                 | 1.65 – 1.88 <i>m</i>              | 42.64                 | CH              |
| 5       | -                              | 40.72                 | -                                 | 40.76                 | C               |
| 6       | 1.81 <i>m</i>                  | 24.97 <sup>3</sup>    | 1.28 <i>m</i>                     | 36.52 <sup>2</sup>    | CH <sub>2</sub> |
|         | 1.52 <i>m</i>                  |                       | 1.65 – 1.88 <i>m</i>              |                       |                 |
| 7       | 1.85 <i>m</i>                  | 36.44 <sup>3</sup>    | 1.65 – 1.88 <i>m</i>              | 25.04 <sup>2</sup>    | CH <sub>2</sub> |
|         | 1.25 <i>m</i>                  |                       | 1.46 – 1.54 <i>m</i>              |                       |                 |
| 8       | -                              | 41.87                 | -                                 | 41.89                 | C               |
| 9       | 1.48 <i>d</i> (10.9)           | 50.60                 | 1.46 – 1.54 <i>m</i>              | 50.67                 | CH              |
| 10      | 2.98 <i>dm</i> (10.9)          | 37.34                 | 2.97 <i>br d</i> (10.2)           | 37.41                 | CH              |
| 11      | -                              | 72.31                 | -                                 | 72.75                 | C               |
| 12      | 1.58–1.68 <i>m</i>             | 46.21                 | 1.65 – 1.88 <i>m</i>              | 46.18                 | CH <sub>2</sub> |
| 13      | 2.41 <i>qd</i> (13.0, 4.4)     | 30.10                 | 2.41 <i>ddd</i> (13.3, 12.4, 4.1) | 30.16                 | CH <sub>2</sub> |
|         |                                |                       | 1.92 – 2.00 <i>m</i>              |                       |                 |
| 14      | 3.99 <i>dd</i> (12.5, 3.5)     | 68.82                 | 4.00 <i>dd</i> (12.4, 3.4)        | 68.80                 | CH              |
| 15      | 1.30 <i>s</i>                  | 14.02                 | 1.30 <i>s</i>                     | 14.07                 | CH <sub>3</sub> |
| 16      | 1.38 <i>s</i>                  | 35.04                 | 1.38 <i>s</i>                     | 35.02                 | CH <sub>3</sub> |
| 17      | 3.61 <i>brd</i> (10.5)         | 40.37                 | 3.61 <i>d</i> (10.5)              | 40.36                 | CH <sub>2</sub> |
|         | 3.93 <i>d</i> (10.5)           |                       | 3.93 <i>d</i> (10.5)              |                       |                 |
| 18      | 1.95 <i>m</i>                  | 25.85                 | 1.92 – 2.00 <i>m</i>              | 25.88                 | CH              |
| 19*     | 0.90 <i>d</i> (6.9)            | 19.84                 | 0.90 <i>d</i> (6.8)               | 19.78                 | CH <sub>3</sub> |
| 20*     | 0.97 <i>d</i> (6.8)            | 26.05 <sup>4</sup>    | 0.97 <i>d</i> (6.8)               | 20.01                 | CH <sub>3</sub> |

<sup>1</sup> NMR data (500 MHz, CDCl<sub>3</sub>) from De Rosa *et al.* [60]; <sup>2</sup> The carbones C6 and C7 were incorrectly assigned in De Rosa *et al.* [60]; <sup>3</sup> Correct assignment of C6/C7 based on <sup>13</sup>C/<sup>1</sup>H correlations observed in HMBC spectrum (1.30s/36.44 H-15/C-7; 3.93d/24.97 H-17/C-6).

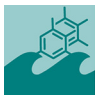

**Table S2** -  $^1\text{H}$  (400 MHz) and  $^{13}\text{C}$  (125 MHz) NMR data ( $\text{CDCl}_3$ ) of 12S-hydroxy-bromosphaerol.

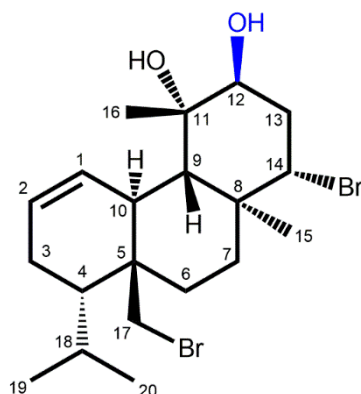

| Atom n° | Tested compound                               |                       | Literature Data <sup>1</sup>                  |                       | Group           |
|---------|-----------------------------------------------|-----------------------|-----------------------------------------------|-----------------------|-----------------|
|         | $\delta^1\text{H}$ , <i>m</i> , <i>J</i> (Hz) | $\delta^{13}\text{C}$ | $\delta^1\text{H}$ , <i>m</i> , <i>J</i> (Hz) | $\delta^{13}\text{C}$ |                 |
| 1       | 5.99 <i>brd</i> (10.6)                        | 128.46                | 5.97 <i>br d</i> (10.4)                       | 128.5                 | CH              |
| 2       | 5.71 <i>m</i>                                 | 127.54                | 5.69 <i>ddt</i> (10.4, 5.0, 2.5)              | 127.5                 | CH              |
| 3       | 1.95 <i>m</i>                                 | 21.93                 | $\alpha$ 1.93 <i>m</i>                        | 21.9                  | CH <sub>2</sub> |
|         | 2.14 <i>m</i>                                 |                       | $\beta$ 2.10 <i>m</i>                         |                       |                 |
| 4       | 1.74 <i>m</i>                                 | 42.62                 | 1.72 <i>br s</i>                              | 42.6                  | CH              |
| 5       | -                                             | 41.07                 | -                                             | 41.1                  | C               |
| 6       | 1.80 <i>m</i>                                 | 24.87                 | $\alpha$ 1.75 <i>m</i>                        | 24.9                  | CH <sub>2</sub> |
|         | 1.53 <i>m</i>                                 |                       | $\beta$ 1.51 <i>m</i>                         |                       |                 |
| 7       | 1.84 <i>m</i>                                 | 36.42                 | $\alpha$ 1.81 <i>m</i>                        | 36.4                  | CH <sub>2</sub> |
|         | 1.31 <i>m</i>                                 |                       | $\beta$ 1.29 <i>m</i>                         |                       |                 |
| 8       | -                                             | 41.78                 | -                                             | 41.8                  | C               |
| 9       | 1.80 <i>m</i>                                 | 45.95                 | 1.78 <i>m</i>                                 | 45.9                  | CH              |
| 10      | 2.99 <i>dm</i> (11.2)                         | 36.82                 | 2.97 <i>dm</i> (11.2)                         | 36.8                  | CH              |
| 11      | -                                             | 74.83                 | -                                             | 74.8                  | C               |
| 12      | 3.47 <i>m</i>                                 | 79.41                 | 3.45 <i>br s</i>                              | 79.4                  | CH              |
| 13      | 2.16 <i>dt</i> (13.8, 3.7)                    | 37.38                 | $\beta$ 2.14 <i>dt</i> (13.7, 3.7)            | 37.4                  | CH <sub>2</sub> |
|         | 2.72 <i>td</i> (13.7, 2.7)                    |                       | $\alpha$ 2.70 <i>ddd</i> (13.7, 12.8, 2.9)    |                       |                 |
| 14      | 4.49 <i>dd</i> (12.6, 3.8)                    | 63.36                 | 4.46 <i>dd</i> (12.8, 3.7)                    | 63.4                  | CH              |
| 15      | 1.29 <i>s</i>                                 | 14.87                 | 1.27 <i>s</i>                                 | 14.9                  | CH <sub>3</sub> |
| 16      | 1.46 <i>s</i>                                 | 31.84                 | 1.44 <i>s</i>                                 | 31.8                  | CH <sub>3</sub> |
| 17      | 3.62 <i>dd</i> (10.6, 1.7)                    | 40.54                 | 3.60 <i>dd</i> (10.8, 2.1)                    | 40.5                  | CH <sub>2</sub> |
|         | 3.95 <i>d</i> (10.6)                          |                       | 3.93 <i>d</i> (10.8)                          |                       |                 |
| 18      | 1.96 <i>m</i>                                 | 25.90                 | 1.93 <i>m</i>                                 | 25.9                  | CH              |
| 19      | 0.91 <i>d</i> (6.8)                           | 19.71                 | 0.89 <i>d</i> (7.0)                           | 19.7                  | CH <sub>3</sub> |
| 20      | 0.97 <i>d</i> (6.8)                           | 25.93                 | 0.95 <i>d</i> (7.0)                           | 25.9                  | CH <sub>3</sub> |
| OH      |                                               |                       |                                               |                       | OH              |

<sup>1</sup> NMR data (500 MHz,  $\text{CDCl}_3$ ) from Smyrniotopoulos *et al.* [21].

**Table S3.**  $^1\text{H}$  (400 MHz) and  $^{13}\text{C}$  (125 MHz) NMR data ( $\text{CDCl}_3$ ) of 12R-hydroxy-bromosphaerol.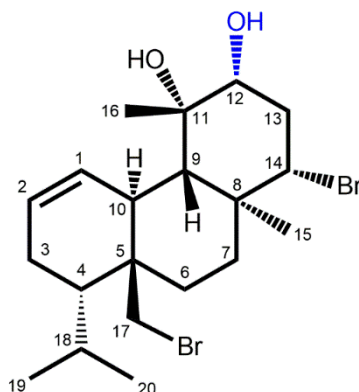

| Tested compound |                                                          |                       | Literature Data <sup>1</sup>                                                              |                       |                 |
|-----------------|----------------------------------------------------------|-----------------------|-------------------------------------------------------------------------------------------|-----------------------|-----------------|
| Atom n°         | $\delta^1\text{H}$ , <i>m</i> , <i>J</i> (Hz)            | $\delta^{13}\text{C}$ | $\delta^1\text{H}$ , <i>m</i> , <i>J</i> (Hz)                                             | $\delta^{13}\text{C}$ | Group           |
| 1               | 6.01 <i>br d</i> (10.6)                                  | 128.79                | 5.99 <i>br d</i> (10.4)                                                                   | 128.8                 | CH              |
| 2               | 5.69 <i>m</i>                                            | 126.41                | 5.67 <i>ddt</i> (10.4, 5.8, 2.9)                                                          | 126.4                 | CH              |
| 3               | 2.14 <i>m</i><br>1.93 <i>m</i>                           | 21.80                 | $\beta$ : 2.12 <i>m</i><br>$\alpha$ : 1.91 <i>m</i>                                       | 21.8                  | CH <sub>2</sub> |
| 4               | 1.77 <i>m</i>                                            | 42.63                 | 1.73 <i>m</i>                                                                             | 42.5                  | CH              |
| 5               | -                                                        | 40.47                 | -                                                                                         | 40.5                  | C               |
| 6               | 1.81 <i>m</i><br>1.52 <i>m</i>                           | 24.94                 | $\alpha$ : 1.77 <i>m</i><br>$\beta$ 1.50 <i>m</i>                                         | 24.9                  | CH <sub>2</sub> |
| 7               | 1.82 <i>m</i><br>1.22 <i>m</i>                           | 35.97                 | $\alpha$ : 1.78 <i>m</i><br>$\beta$ : 1.18 <i>m</i>                                       | 36.0                  | CH <sub>2</sub> |
| 8               | -                                                        | 41.97                 | -                                                                                         | 42.0                  | C               |
| 9               | 1.40 <i>d</i> (10.7)                                     | 48.71                 | 1.38 <i>d</i> (10.8)                                                                      | 48.7                  | CH              |
| 10              | 3.03 <i>dm</i> (10.7)                                    | 37.49                 | 3.02 <i>dm</i> (10.8)                                                                     | 37.5                  | CH              |
| 11              | -                                                        | 73.46                 | -                                                                                         | 73.5                  | C               |
| 12              | 3.37 <i>dd</i> (11.7, 5.2)                               | 76.94                 | 3.34 <i>dt</i> (11.6, 5.4)                                                                | 76.9                  | CH              |
| 13              | 2.23 <i>ddd</i> (12.4, 5.2, 3.2)<br>2.35 <i>q</i> (12.4) | 38.03                 | $\beta$ 2.21 <i>ddd</i> (12.4, 5.4, 3.3)<br>$\alpha$ : 2.33 <i>ddd</i> (12.8, 12.4, 11.6) | 37.9                  | CH <sub>2</sub> |
| 14              | 3.90 <i>dd</i> (12.8, 3.2)                               | 62.96                 | 3.88 <i>dd</i> (12.8, 3.3)                                                                | 63.0                  | CH              |
| 15              | 1.26 <i>s</i>                                            | 13.64                 | 1.25 <i>s</i>                                                                             | 13.6                  | CH <sub>3</sub> |
| 16              | 1.43 <i>s</i>                                            | 30.86                 | 1.41 <i>s</i>                                                                             | 30.9                  | CH <sub>3</sub> |
| 17              | 3.91 <i>d</i> (10.3)<br>3.60 <i>brd</i> (10.3)           | 40.28                 | 3.89 <i>d</i> (10.4)<br>3.59 <i>dd</i> (10.4, 1.7)                                        | 40.3                  | CH <sub>2</sub> |
| 18              | 1.94 <i>m</i>                                            | 25.83                 | 1.93 <i>m</i>                                                                             | 25.8                  | CH              |
| 19*             | 0.91 <i>d</i> (6.8)                                      | 19.94                 | 0.89 <i>d</i> (7.1)                                                                       | 19.9                  | CH <sub>3</sub> |
| 20*             | 0.98 <i>d</i> (6.8)                                      | 26.13                 | 0.95 <i>d</i> (7.1)                                                                       | 26.1                  | CH <sub>3</sub> |

<sup>1</sup> NMR data (500 MHz,  $\text{CDCl}_3$ ) from Smyrniotopoulos *et al.* [21]

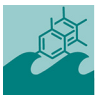

- Cytotoxic activities of anticancer standard drugs

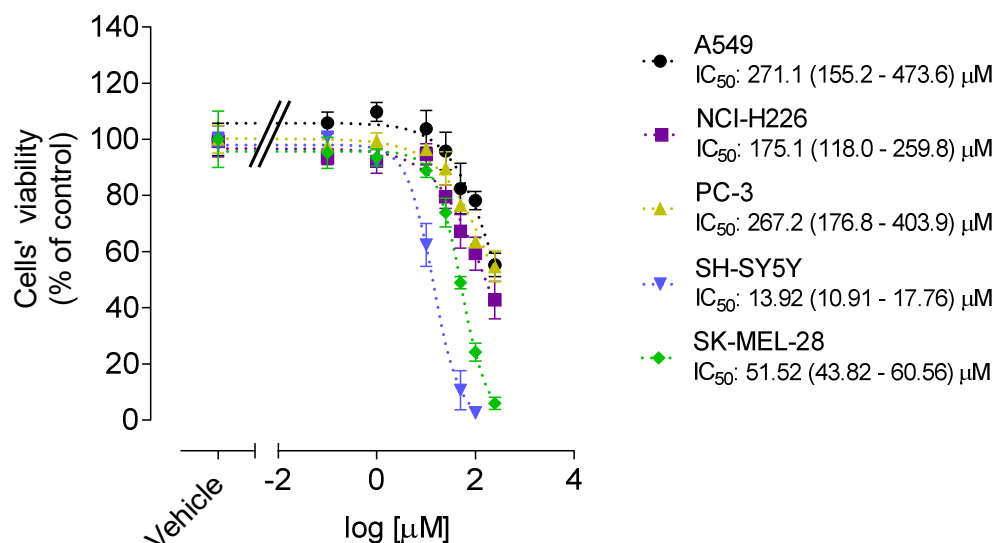

**Figure S1.** Dose-response curves of cisplatin (0.1 - 250  $\mu\text{M}$ ; 24 h) on malignant cells' viability (% of control) for  $\text{IC}_{50}$  determination. The effects were revealed through the MTT assay. The values represent mean  $\pm$  SEM of at least three independent experiments carried out in triplicate. The values in parentheses represent the confidence intervals for 95%.

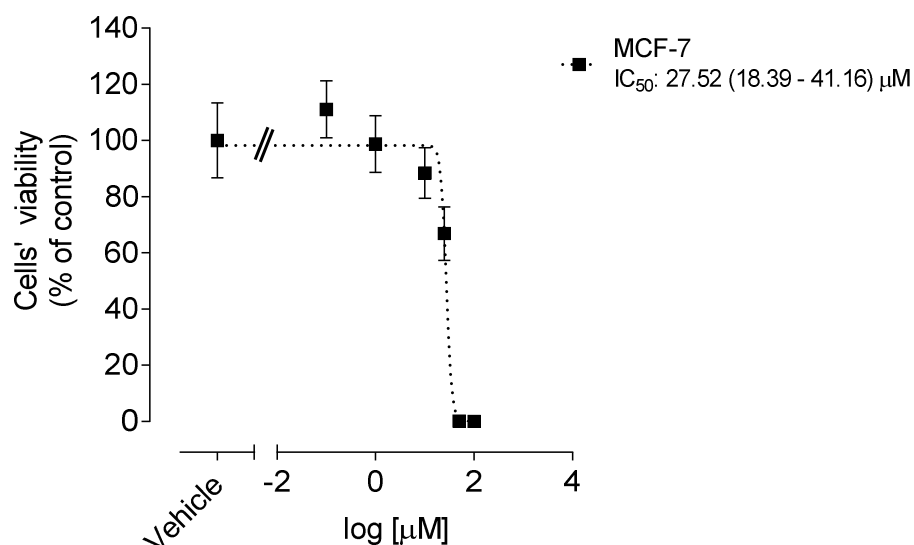

**Figure S2.** Dose-response curve of tamoxifen (0.1 - 100  $\mu\text{M}$ ; 24 h) on MCF-7 cells' viability (% of control) for  $\text{IC}_{50}$  determination. The effects were revealed through the MTT assay. The values represent mean  $\pm$  SEM of at least three independent experiments carried out in triplicate. The values in parentheses represent the confidence intervals for 95%.

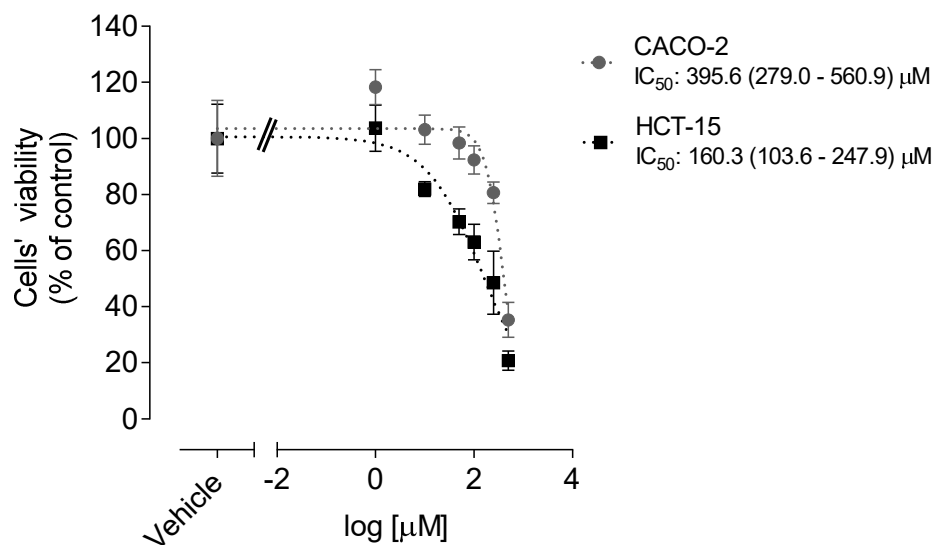

**Figure S3.** Dose-response curve of 5-fluorouracil (0.1 – 500  $\mu$ M; 24 h) on colorectal cancer cells' viability (% of control) for  $IC_{50}$  determination. The effects were revealed through the MTT assay. The values represent mean  $\pm$  SEM of at least three independent experiments carried out in triplicate. The values in parentheses represent the confidence intervals for 95%.
